# Supplementary material for: Exploring the Untapped Potential of Pine Nut Skin By-Products: A Holistic Characterization and Recycling Approach
Source: MDPI journal article supplement (doi:10.3390/foods13071044), 2024-03-28
Supplement: s1 [file s1]

Table S1. Multiresidual list of pesticides assessed in pine nut skin (PNS) by GC-MS/MS (list 1) and LC-MS/MS (list 2)

LIST 1

|                                                                                |                                                           |                                                                               |                                                                      |
|--------------------------------------------------------------------------------|-----------------------------------------------------------|-------------------------------------------------------------------------------|----------------------------------------------------------------------|
| Acephate                                                                       | Aclonifen                                                 | Acrinathrin                                                                   | Alachlor                                                             |
| Ametryn                                                                        | Amitraz                                                   | Atrazine                                                                      | Azinphos ethyl                                                       |
| Azinphos methyl                                                                | Azoxystrobin                                              | Benalaxyl                                                                     | Benfluralin                                                          |
| Benfuracarb                                                                    | Bifenthrin                                                | Bitertanol                                                                    | Boscalid                                                             |
| Bromopropylate                                                                 | Bromuconazole (sum of diastereoisomer)                    | Bupirimate                                                                    | Buprofezin                                                           |
| Cadusafos                                                                      | Captafol                                                  | Captan                                                                        | Carbaryl                                                             |
| Carbofuran                                                                     | Carbophenothion                                           | Carbosulfan                                                                   | Chlorfenapyr                                                         |
| Chlorfevinphos                                                                 | Chlormefos                                                | Chlorothalonil                                                                | Chlorpropham                                                         |
| Chlorpyrifos ethyl                                                             | Chlorpyrifos methyl                                       | Chlorthal dimetil                                                             | Chlozolate                                                           |
| Chlordane                                                                      | Cypermethrin (sum of isomers)                             | Cyproconazole                                                                 | Cyprodinil                                                           |
| Cyflutrin (sum of isomers)                                                     | Deltamethrin                                              | Diazinon                                                                      | Dichlobenil                                                          |
| DDT (sum of p,p' DDT, o,p' DDT, p,p' DDE, and p,p' TDE (DDD) expressed as DDT) | Dichloran.                                                | Dichlorvos                                                                    | Diclobutrazol                                                        |
| Dichiofluania                                                                  | Dieldrin (sum of Aldrin and Dieldrin expressed as Delrin) | Difenoconazole                                                                | Dimethoate (sum of Dimethoate and Omethoate expressed as Dimethoate) |
| Dicofol                                                                        | Disulfoton                                                | Endosulfan-sulfate (sum of isomer a,b, e sulfate expressed as Endosulfan)     | Diquat                                                               |
| Diphenylamine                                                                  | Ethiofencarb                                              | Ethion                                                                        | Endrin                                                               |
| Esfenvalerate                                                                  | Etofenprox                                                | Exithiazox                                                                    | Ethoprophos                                                          |
| Ethoxyguine                                                                    | Fenamiphos                                                | Fenarimol                                                                     | Famoxadone                                                           |
| Fenamidone                                                                     | Fenchlorphos                                              | Fenhexamid                                                                    | Fenazaquin                                                           |
| Fenbuconazole                                                                  | Fenpropathrin                                             | Fenpropidin                                                                   | Fenitrothion                                                         |
| Fenoxycarb                                                                     | Fipronil                                                  | Fluazifop P.butile                                                            | Fenthion                                                             |
| Fenvalerate                                                                    | Flusilazole                                               | Fluvalinate                                                                   | Flucytrinate                                                         |
| Fludioxonl                                                                     | Furathiocarb                                              | Heptachlor (sum of Heptachlor and Heptachlor epoxide expressed as Heptachlor) | Folpet                                                               |
| Furalaxit                                                                      | HCH-a                                                     | HCH                                                                           | Heptenophos                                                          |
| Hexachlorobenzene                                                              | haloxyfop methyl                                          | Indoxacarb (sum of Indoxacarb and its enantiomer R)                           | Gamma - hexachlorohexane (lindane)                                   |
| Hexaconazole                                                                   | Imazall                                                   | Kresoxim-methyl                                                               | Iprodione                                                            |
| Iprovalicarb                                                                   | Isophenphos                                               | Malathion                                                                     | Lambda-Cyhalothrin                                                   |
| Lenacil                                                                        | Linuron                                                   | Methidathion                                                                  | Mepanipyrim                                                          |
| Metalaxyl (sum of isomers including Metalaxyl-m)                               | Methamidophos                                             | Methoxiclor                                                                   | Methiocarb                                                           |
| Metholachlor                                                                   | Methomyl                                                  | Oxadixyl                                                                      | Metribuzin                                                           |
| Myclobutanil                                                                   | Nuarimol                                                  | Parathion ethyl                                                               | Oxamyl                                                               |
| Oxyfluorfen                                                                    | Paclobutrazolo                                            | Permethrin (sum of isomers)                                                   | Parathion methyl                                                     |
| Penconazole                                                                    | Pendimetalin                                              | Phosmet                                                                       | Pertane                                                              |
| Phorate                                                                        | Phosalone                                                 | Procymidone                                                                   | Phosphamidon                                                         |
| Pirimicarb                                                                     | Prochloraz                                                | Propargite                                                                    | Profenophos                                                          |
| Propachior                                                                     | Propoxur                                                  | Propyzamide                                                                   | Propham                                                              |
| Propiconazole                                                                  | Pyrethrins (technical mixture)                            | Pyridaben                                                                     | Pyraclostrobin                                                       |
| Pyrazofos                                                                      | Pyrimethanil                                              | Pyriproxyfen                                                                  | Pyridaphenthion                                                      |
| Pyrifeno                                                                       | Quintozone                                                | Quizalofop ethyl                                                              | Quinalfos                                                            |
| Quinoxifen                                                                     | Spiromesifen                                              | Sulfotep                                                                      | Simazine                                                             |
| Symetryn                                                                       | Tecnazen                                                  | Tefluthrin                                                                    | Tebuconazole                                                         |
| Tebutenpyrad                                                                   | Tetraconazole                                             | Tetradifon                                                                    | Terbutryn                                                            |
| Tetrachlorvinphos                                                              | Tolclofos methyl                                          | Tolyfluanid                                                                   | Tetramethrin                                                         |
| Thionazin                                                                      | Trichlorfon                                               | Trifloxystrobin                                                               | Triadimefon e Triadimenol (sum of Triadimefon and Triadimenol)       |
| Triazophos                                                                     | Zoxamide                                                  |                                                                               | Trifluralin                                                          |
| Vinclozolin                                                                    |                                                           |                                                                               |                                                                      |

LIST 2

|                                                                                              |              |                                                                                |                                                                                |
|----------------------------------------------------------------------------------------------|--------------|--------------------------------------------------------------------------------|--------------------------------------------------------------------------------|
| 2,4-D (sum of 2,4-D, its salts, esters, and conjugates expressed as 2,4-D)                   | Abamectin    | Acephate                                                                       | Acetamidiprid                                                                  |
| Aldicarb (sum of Aldicarb, Aldicarb- sulfone, and Aldicarb- sulfoxide expressed as Aldicarb) | Ametoctradin | Atrazine                                                                       | Azadirachtin                                                                   |
| Azoxystrobin                                                                                 | Benthiocarb  | Bifenazato (sum of bifenazato and bifenazato- diazene expressed as bifenazato) | Boscalid                                                                       |
| Brodifacoum                                                                                  | Bromadiolone | Bromuconazole (sum of Diastereoisomeri)                                        | Butoxycarboxim                                                                 |
| Buturon                                                                                      | Carbaryl     | Carbendazim (sum of Benomil and Carbendazim expressed as Carbendazim)          | Carbofuran (sum of Carbofuran and 3-Hydroxycarbofuran expressed as Carbofuran) |
| Chlorantraniliprole                                                                          | Dodine       | Chlorotoluron                                                                  | Chlorsulfuron                                                                  |
| Chlothianidin                                                                                | Etiofencarb  | Clofentezine                                                                   | Cyanophenfos                                                                   |
| Cyantraniliprole                                                                             | Fenazaquin   | Cycloxydim                                                                     | Cyflufenamid                                                                   |
| Cymoxanil                                                                                    | Fenoxycarb   | Demeton S-methyl sulphone                                                      | Diflufenican                                                                   |
| Diethofencarb                                                                                | Fenuron      | Biflubenzuron                                                                  | Ditalimfos                                                                     |
| Dimethomorph                                                                                 | Fluometuron  | Dioxacarb                                                                      | Emamectina benzoato (Emamectina B1A expressed as Emamectina)                   |
| Diuron                                                                                       | Flutriafol   | Ema B1B                                                                        | Etoxazole                                                                      |
| Epoxiconazole                                                                                | Furathiocarb | Ethofenprox                                                                    | Fenbutatin oxide                                                               |
| Famoxadone                                                                                   | Imazamox     | Fenbuconazole                                                                  | Fenpyrazamine                                                                  |
| Fenhexamid                                                                                   | Isocarbophos | Fenpropimorph                                                                  | Flonicamid (sum of Flonicamid, TFNA, and TFNG)                                 |
| Fenpyroximate                                                                                | Linuron      | Fipronil (sum of Fipronil)                                                     |                                                                                |
| Flufenoxuron                                                                                 |              |                                                                                |                                                                                |

|                         |                       |                              |                           |
|-------------------------|-----------------------|------------------------------|---------------------------|
| Flupyradifurone         | Mepronil              | and Sulfone metabolite       | expressed as Flonicamid)  |
| Fosthiazate             | Metamitron            | expressed as Fipronil)       | Fluopyram Formetanate     |
| Imazalil                | Metholachlor, S-      | Fluopicolide                 | Hexythiazox               |
| Iprovalicarb            | Metoxuron             | Fluxapyroxad                 | Indoxacarb (sum of        |
| Isopyrazam              | Monolinuron           | Hexaflumuron                 | indoxacarb and its        |
| Mepanipyrim             | Oxadiazon             | Imidacloprid                 | enantiomer R)             |
| Metalaxyl-m Methiocarb  | Oxydemethon methyl    | Isofenphos-methyl            | Isoproturon               |
| (sum of Methiocarb,     | Pirimiphos-ethyl      | Lufenuron Metaflumizone      | Mandipropamid             |
| Methiocarb- sulfone,    | Propamocarb (sum of   | Metazachlor                  | Metalaxyl (sum of         |
| Methiocarb-sulfoxide    | Propamocarb e its     | Methomyl (sum of Methomyl    | isomers including         |
| expressed as            | salts expressed as    | and Thiodicarb expressed     | Metalaxyl-m)              |
| Methiocarb)             | Propamocarb)          | as Methomyl)                 | Methamidophos             |
| Metobromuron            | Pymetrozine           | Metrafenone                  | Methoxyfenozide           |
| Milbemectina A4         | Rotenone              | Monuron                      | Milbemectina A3           |
| Nitenpyran              | Spinosad (sum of      | Oxadixyl                     | Neburon                   |
| Oxamyl-oxime            | Spinosyn-a,           | Penthiopyrad                 | Oxamyl                    |
| Pirimicarb              | Spinosyn-d expressed  | Pirimiphos-methyl            | Phenmedipham              |
| Prometrin               | as Spinosad)          | Propargite                   | Promecarb                 |
| Prosulfocarb            | Spiroxamine           | Pyraclostrobin               | Propoxur                  |
| Pyriproxyfen            | Teflubenzuron         | Simazine                     | Pyraflufen-ethyl          |
| Spinetoram              | Thiobencarb           | Spirodiclofen                | Milbemectina (sum of      |
| (Spirotetramat and its  | Tridemorph            | Sulfoxaflor (sum of isomers) | Milbemectina A4           |
| 4 metabolites expressed | (Aquatecide) 2-4 Na   | Thiabendazole                | and Milbemectina A3       |
| as Spirotetramat)       | diclorophenoxyacetate | Thiocyclam                   | expressed as Milbemectina |
| Tebuufenpyrad           | Tiguron               | Triflumuron                  | Spiromesifen              |
| Thiametoxam             |                       |                              | Tebuufenozide             |
| Tolclofos methyl        |                       |                              | Thiacloprid               |
| Zoxamide                |                       |                              | Thiophanate methyl        |
|                         |                       |                              | Triforine                 |
